# Supplementary material for: Assessment of the Bacteria community structure across life stages of the Chinese Citrus Fly, Bactrocera minax (Diptera: Tephritidae)
Source: PubMed Central journal article supplement (PMC6929268; doi:10.1186/s12866-019-1646-9), 2019-12-24
Supplement: 12866_2019_1646_MOESM1_ESM.pdf [file 12866_2019_1646_MOESM1_ESM.pdf]

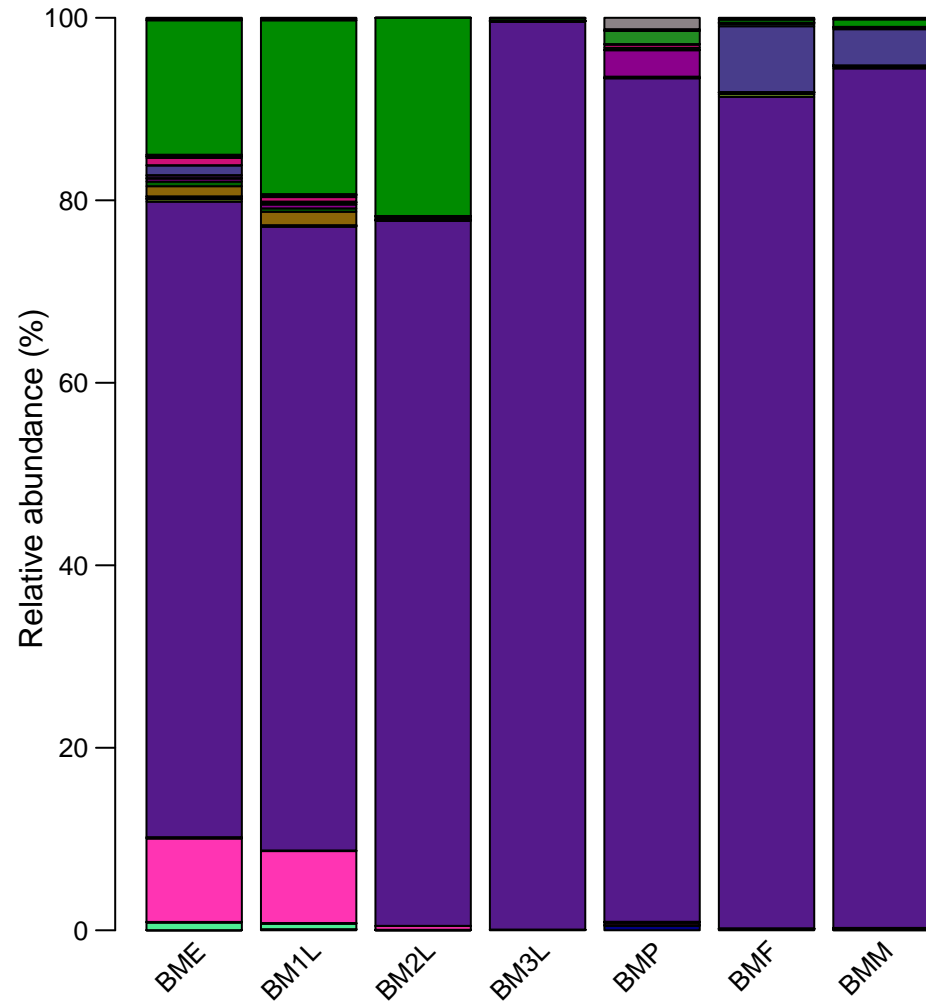

- *Acetobacteraceae*
- *Alcaligenaceae*
- *Bacillales\_Incertae\_Sedis\_XI*
- *Bradyrhizobiaceae*
- *Brucellaceae*
- *Burkholderiaceae*
- *Burkholderiales\_incertae\_sedis*
- *Carnobacteriaceae*
- *Caulobacteraceae*
- *Chitinophagaceae*
- *Clostridiales\_Incertae\_Sedis\_XI*
- *Comamonadaceae*
- *Corynebacteriaceae*
- *Cytophagaceae*
- *Desulfovibrionaceae*
- *Enterobacteriaceae*
- *Enterococcaceae*
- *Flavobacteriaceae*
- *Fusobacteriaceae*
- *Lactobacillaceae*
- *Legionellaceae*
- *Leptotrichiaceae*
- *Leuconostocaceae*
- *Methylobacteriaceae*
- *Microbacteriaceae*
- *Micrococcaceae*
- *Moraxellaceae*
- *Neisseriaceae*
- *Paenibacillaceae\_1*
- *Porphyromonadaceae*
- *Propionibacteriaceae*
- *Pseudomonadaceae*
- *Rhizobiaceae*
- *Rhodobacteraceae*
- *Rhodocyclaceae*
- *Sphingobacteriaceae*
- *Sphingomonadaceae*
- *Staphylococcaceae*
- *Streptococcaceae*
- *Thermaceae*
- *TM7\_family\_incertae\_sedis*
- *unclassified*
- *Xanthomonadaceae*
